# Supplementary material
Source: ML conference proceedings conference paper supplement (https://openreview.net/forum?id=HGxGCjqnDd)
Supplement: supplementary_material [file attachment]

## A ADDITIONAL EXPERIMENTAL DETAILS

### A.1 COMPUTATIONAL HARDWARE

All our experiments were carried out on Linux servers equipped with an AMD EPYC 7763 64-Core CPU processor, 512GB RAM, and NVIDIA RTX 6000 ADA 48G / A800 80G GPU.

### A.2 HYPERPARAMETERS

Table 6: Hyperparameter configurations for GLUE benchmark.

| Model | Hyperparameter            | SST-2     | MRPC | CoLA | QNLI | RTE  | STS-B |
|-------|---------------------------|-----------|------|------|------|------|-------|
| BASE  | Optimizer                 | AdamW     |      |      |      |      |       |
|       | LR Scheduler              | Linear    |      |      |      |      |       |
|       | Warmup Ratio              | 0.06      |      |      |      |      |       |
|       | Max Seq. Len.             | 512       |      |      |      |      |       |
|       | Spectral Coefficients $n$ | {250,500} |      |      |      |      |       |
|       | Rank $r$                  | 32        | 64   | 64   | 8    | 32   | 256   |
|       | Epochs                    | 50        | 30   | 100  | 40   | 100  | 90    |
|       | Batch Size                | 128       | 32   | 128  | 32   | 32   | 32    |
|       | LR (Head)                 | 6E-4      | 6E-4 | 3E-4 | 6E-5 | 3E-4 | 2E-4  |
|       | LR (FoRA)                 | 2E-2      | 4E-2 | 4E-2 | 7E-2 | 3E-2 | 2E-2  |
|       | Rank $r$                  | 32        | 32   | 32   | 32   | 32   | 32    |
| LARGE | Epochs                    | 20        | 50   | 100  | 30   | 70   | 40    |
|       | Batch Size                | 128       | 32   | 128  | 8    | 32   | 32    |
|       | LR (Head)                 | 1E-4      | 2E-4 | 4E-4 | 4E-4 | 3E-4 | 7E-5  |
|       | LR (FoRA)                 | 3E-2      | 5E-2 | 4E-2 | 2E-2 | 2E-2 | 3E-2  |
|       |                           |           |      |      |      |      |       |

Table 7: Hyperparameter configurations for mathematical reasoning.

| Hyperparameter            | LLaMA2 <sub>7B</sub> |      | LLaMA2 <sub>13B</sub> |      | LLaMA3 <sub>8B</sub> |      |
|---------------------------|----------------------|------|-----------------------|------|----------------------|------|
|                           | GSM8k                | MATH | GSM8k                 | MATH | GSM8k                | MATH |
| Optimizer                 | AdamW                |      |                       |      |                      |      |
| LR Scheduler              | Cosine               |      |                       |      |                      |      |
| Batch Size                | 16                   |      |                       |      |                      |      |
| Warmup Ratio              | 0.05                 |      |                       |      |                      |      |
| Dropout                   | 0.05                 |      |                       |      |                      |      |
| Epochs                    | 3                    |      |                       |      |                      |      |
| Where                     | Q,V                  |      |                       |      |                      |      |
| Spectral Coefficients $n$ | 20000                |      | 30000                 |      | 20000                |      |
| Rank $r$ (FoRA)           | 256                  | 128  | 256                   | 128  | 256                  | 128  |
| Rank $r$ (DFoRA)          | 256                  | 128  | 256                   | 128  | 128                  | 128  |
| LR (LoRA)                 | 5E-4                 | 5E-4 | 5E-4                  | 6E-4 | 5E-4                 | 5E-4 |
| LR (DoRA)                 | 4E-4                 | 5E-4 | 4E-4                  | 6E-4 | 6E-4                 | 2E-4 |
| LR (FoRA)                 | 6E-3                 | 5E-3 | 5E-3                  | 5E-3 | 1E-3                 | 9E-4 |
| LR (DFoRA)                | 5E-3                 | 3E-3 | 6E-3                  | 6E-3 | 1E-3                 | 9E-4 |

Table 8: Hyperparameter configurations for commonsense reasoning.

| Hyperparameter            | LLaMA <sub>7B</sub> |        | LLaMA <sub>13B</sub> |       | LLaMA <sub>27B</sub> |       | LLaMA <sub>38B</sub> |       |
|---------------------------|---------------------|--------|----------------------|-------|----------------------|-------|----------------------|-------|
|                           | FoRA                | DFoRA  | FoRA                 | DFoRA | FoRA                 | DFoRA | FoRA                 | DFoRA |
| Optimizer                 | AdamW               |        |                      |       |                      |       |                      |       |
| LR Scheduler              | Linear              |        |                      |       |                      |       |                      |       |
| Batch Size                | 16                  |        |                      |       |                      |       |                      |       |
| Warmup Steps              | 100                 |        |                      |       |                      |       |                      |       |
| Dropout                   | 0.05                |        |                      |       |                      |       |                      |       |
| Epochs                    | 3                   |        |                      |       |                      |       |                      |       |
| Rank $r$                  | 32                  |        |                      |       |                      |       |                      |       |
| Alpha $\alpha$            | 64                  |        |                      |       |                      |       |                      |       |
| Where                     | Q,K,V,Up,Down       |        |                      |       |                      |       |                      |       |
| Spectral Coefficients $n$ | 30000               |        | 40000                |       | 30000                |       | 30000                |       |
| LR                        | 1E-3                | 1.4E-3 | 9E-4                 | 9E-4  | 8E-4                 | 8E-4  | 5E-4                 | 5E-4  |

Table 9: Hyperparameter configurations for finetuning ViT on the image classification datasets.

| Model | Hyperparameter            | OxfordPets | StanfordCars | DTD  | EuroSAT | FGVC | RESISC |
|-------|---------------------------|------------|--------------|------|---------|------|--------|
| BASE  | Optimizer                 | AdamW      |              |      |         |      |        |
|       | Epochs                    | 10         |              |      |         |      |        |
|       | Batch Size                | 64         |              |      |         |      |        |
|       | Rank $r$ (LoRA)           | 16         |              |      |         |      |        |
|       | Spectral Coefficients $n$ | 8000       |              |      |         |      |        |
|       | Rank $r$ (FoRA)           | 32         | 128          | 64   | 64      | 256  | 32     |
| LARGE | LR (Head)                 | 8E-3       | 1E-2         | 1E-2 | 1E-4    | 1E-2 | 1E-2   |
|       | LR (FoRA)                 | 4E-3       | 5E-2         | 5E-3 | 2E-2    | 5E-2 | 2E-2   |
|       | Weight Decay              | 4E-2       | 1E-5         | 2E-4 | 4E-3    | 2E-2 | 9E-2   |
|       | Rank $r$ (FoRA)           | 64         | 128          | 128  | 64      | 256  | 32     |
|       | LR (Head)                 | 6E-3       | 5E-3         | 1E-2 | 1E-3    | 1E-2 | 1E-2   |
|       | LR (FoRA)                 | 5E-3       | 3E-2         | 4E-3 | 3E-2    | 8E-2 | 1E-2   |
|       | Weight Decay              | 3E-4       | 2E-5         | 3E-5 | 3E-3    | 1E-2 | 1E-3   |

### A.3 PARAMETER COUNT OF SPARSE LEARNING STRATEGIES

As the rank increases, the number of learnable parameters in LoRA grows linearly, leading to a significant parameter overhead. While VeRA exhibits a minimal increase in parameters, its strong dependence on the size of its adaptation matrices limits its flexibility in adapting to more complex tasks. In contrast, both FoRA and random masking maintain a fixed number of learnable parameters across different ranks, providing greater flexibility by allowing parameter adjustments based on task complexity.

Table 10: Comparison of learnable parameters across different compression strategies.

|                         | Methods   | Rank $r$ |        |        |        |        |         |
|-------------------------|-----------|----------|--------|--------|--------|--------|---------|
|                         |           | $2^3$    | $2^4$  | $2^5$  | $2^6$  | $2^7$  | $2^8$   |
| RoBERTa <sub>BASE</sub> | LoRA      | 6,144    | 12,288 | 24,576 | 49,152 | 98,304 | 196,608 |
|                         | VeRA      | 776      | 784    | 800    | 832    | 896    | 1024    |
|                         | FoRA/Mask | 500      | 500    | 500    | 500    | 500    | 500     |
| ViT <sub>BASE</sub>     | LoRA      | 6,144    | 12,288 | 24,576 | 49,152 | 98,304 | 196,608 |
|                         | VeRA      | 776      | 784    | 800    | 832    | 896    | 1024    |
|                         | FoRA/Mask | 6,144    | 8000   | 8000   | 8000   | 8000   | 8000    |

## B IMPLEMENTATION

Algorithm 1 presents the PyTorch implementation of FoRA. Our approach allows for a straightforward plug-in, with the only modification needed being the replacement of the PyTorch linear module with the FoRA linear module. Additionally, we create a cached empty spectral matrix that matches the size of the adaptation matrix. This caching strategy not only accelerates GPU computations but also minimizes GPU overhead, as only the sparse spectral coefficients require backward propagation.

### Algorithm 1 FoRA PyTorch Implementation

```

class PEFT(nn.Module):
    def __init__(self, ...):
        if LoRA:
            A, B = torch.nn.Linear(d1, r), torch.nn.Linear(r, d2)
        elif FoRA:
            A, B = FoRALinear(n, d1, r), FoRALinear(n, r, d2)

class FoRALinear(nn.Module):
    def __init__(self, n, din, dout):
        self.n = n # number of spectral coefficients
        self.din = din # input dimension
        self.dout = dout # output dimension
        # spectral location
        self.L = torch.randperm(din * dout)[:n]
        self.L = torch.stack([self.L // din, self.L % dout], dim=0)
        # spectral coefficients
        self.s = nn.Parameter(torch.zeros(n))
        # cached spectral matrix
        self.cached_F = torch.zeros(self.din, self.dout)

    def weight(self):
        # spectral assignment
        F = self.cached_F.clone()
        F[self.L[0], self.L[1]] = self.s
        # spatial conversion
        W = torch.fft.ifft2(F).real()
        return W

```

## C GENERATION EXAMPLES

## Instruction Tuning (MATH)

How many inches are in the circumference of a great circle of a sphere which has a surface area of  $196\pi$  sq in? Express your answer in terms of  $\pi$ .

Note: To measure the circumference, take the largest circle on the surface of the sphere.

Answer the above question. First think step by step and then answer the final number.

## Response

## Model

**LLaMA2<sub>7B</sub> (FoRA)**

## Response

The surface area of a sphere is  $\pi r^2$ , where  $r$  is the radius.

So, the radius is  $r = \sqrt{196\pi} = 12\sqrt{3}$ .

The circumference of the sphere is  $2\pi r = \boxed{24\pi}$ .

The final answer is:  $24\pi$ .

**LLaMA3<sub>8B</sub> (FoRA)**

The surface area of a sphere is  $4\pi r^2$ , so  $r^2 = 49$  and  $r = 7$ .

The circumference of the great circle is  $2\pi r = \boxed{14\pi}$ .

The final answer is:  $14\pi$ .

## Instruction Tuning (HellaS.)

Please choose the correct ending to complete the given sentence: Roof shingle removal: A man is sitting on a roof. he

Ending1: is using wrap to wrap a pair of skis. Ending2: is ripping level tiles off. Ending3: is holding a rubik's cube. Ending4: starts pulling up roofing on a roof.

Answer format: ending1/ending2/ending3/ending4

## Response

## Model

**LLaMA2<sub>7B</sub> (FoRA)**

## Response

the correct answer is ending2

**LLaMA3<sub>8B</sub> (FoRA)**

the correct answer is ending4
